# Supplementary material for: Exploiting XPS for the identification of sulfides and polysulfides
Source: Royal Society of Chemistry journal article supplement (doi:10.1039/c5ra14915k), 2015-01-01
Supplement: c5ra14915k1.pdf [file c5ra14915k1.pdf]

# Exploiting XPS for the identification of sulfides and polysulfides. SUPPORTING INFORMATION

Marzia Fantauzzi<sup>1,\*</sup>, Bernhard Elsener<sup>1,2</sup>, Davide Atzei<sup>1</sup>, Americo Rigoldi<sup>1</sup>, Antonella Rossi<sup>1</sup>

<sup>1</sup>Dipartimento di Scienze Chimiche e Geologiche, Università degli Studi di Cagliari, Campus di Monserrato S.S. 554 – Italy and INSTM, UdR Cagliari – Italy

<sup>2</sup>ETH Zurich, Institute for Building Materials, ETH Hönggerberg, CH-8093 Zurich

\* corresponding author

This file includes the electronic supporting information of the paper entitled “Exploiting XPS for the identification of sulfides and polysulfides.

## Tables

Table S.I.T1: Peak-fitting parameters of S<sup>2-</sup> determined on ground sulfide minerals (10 minutes under Argon)

|                                  |                     | Binding Energy | FWHM      |                                |
|----------------------------------|---------------------|----------------|-----------|--------------------------------|
| Cu <sub>3</sub> AsS <sub>4</sub> | S2p <sub>3/2</sub>  | 161.8 (0.1)    | 1.4 (0.2) |                                |
| FeAsS                            | S2p <sub>3/2</sub>  | 162.1 (0.1)    | 1.5 (0.2) |                                |
|                                  |                     |                |           |                                |
|                                  | SKLL                | Kinetic Energy | FWHM      | Area comp./Area <sup>1</sup> D |
| Cu <sub>3</sub> ASS <sub>4</sub> | <sup>1</sup> D SKLL | 2116.0 (0.2)   | 1.6 (0.2) | 1                              |
|                                  | sat SKLL            | 2111.8 (0.2)   | 2.5 (0.1) | 0.05                           |
|                                  | <sup>1</sup> S SKLL | 2107.8 (0.2)   | 2.5 (0.2) | 0.1                            |
| FeAsS                            | <sup>1</sup> D SKLL | 2116.4 (0.2)   | 1.4 (0.1) | 1                              |
|                                  | sat SKLL            | 2112.3 (0.2)   | 2.3 (0.2) | 0.05                           |
|                                  | <sup>1</sup> S SKLL | 2108.2 (0.2)   | 2.3 (0.2) | 0.1                            |

Table S.I. t2: XPS quantitative composition of the commercial alkali metal sulfides determined according to first principle method. Accuracy is estimated to be  $\pm 10$  at%

|                                | Cation at%                                                                                                                   | Sulfur tot at% | S at% for each component |
|--------------------------------|------------------------------------------------------------------------------------------------------------------------------|----------------|--------------------------|
| Li <sub>2</sub> S              | 66<br><br>(Li - S <sup>2-</sup> and Li - S <sub>n</sub> <sup>2-</sup> :<br>32.5%;<br><br>Li – sulfate and sulfite:<br>33.5%) | 34             | Sulfide 13%              |
|                                |                                                                                                                              |                | Terminal S 2%            |
|                                |                                                                                                                              |                | Central S 3%             |
|                                |                                                                                                                              |                | Sulfite 14               |
|                                |                                                                                                                              |                | Sulfate 2%               |
| Na <sub>2</sub> S              | 40                                                                                                                           | 60             | Terminal S 18%           |
|                                |                                                                                                                              |                | Central S 37%            |
|                                |                                                                                                                              |                | Sulfate 5%               |
| Na <sub>2</sub> S <sub>4</sub> | 36                                                                                                                           | 64             | Terminal S 23%           |
|                                |                                                                                                                              |                | Central S 37%            |
|                                |                                                                                                                              |                | Sulfate 4%               |
| K <sub>2</sub> S <sub>n</sub>  | 43                                                                                                                           | 57             | Terminal S 28%           |
|                                |                                                                                                                              |                | Central S 24%            |
|                                |                                                                                                                              |                | Sulfate 4%               |

**Figure captions:**

S.I. Fig. 1: *S2p and SKLL spectra of ground sulfide minerals: enargite ( $\text{Cu}_3\text{AsS}_4$ ), chalcopyrite ( $\text{CuFeS}_2$ ) and arsenopyrite ( $\text{FeAsS}$ ).*

S.I. Fig. 2: *S2p spectra of as received  $\text{Na}_2\text{S}$  and of  $\text{Na}_2\text{S}$  after grinding (10 minutes) under Argon atmosphere (glove box).*

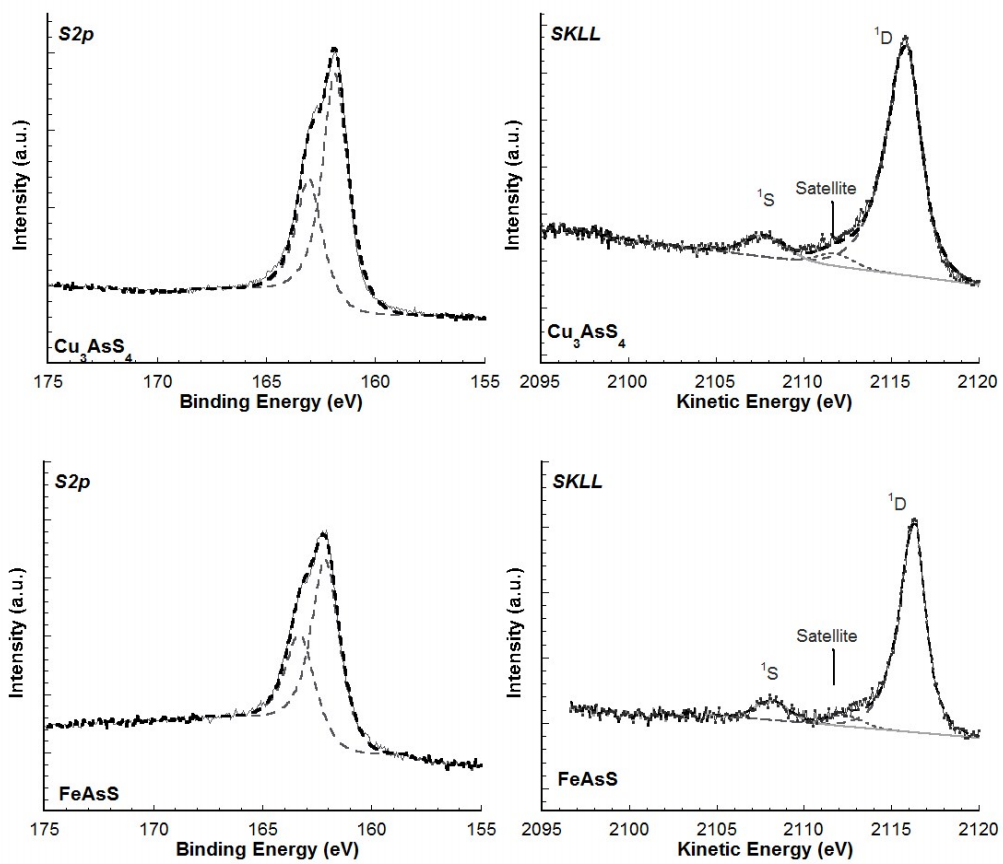

*S.I. Fig. 1*

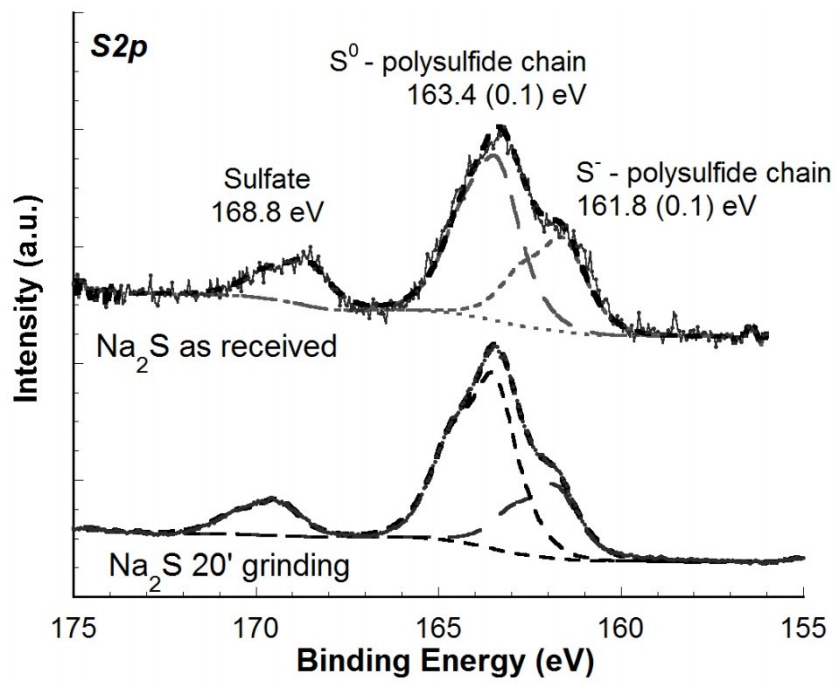

S.I. Fig. 2
